# Supplementary material
Source: publisher figshare collection journal article supplement (https://sage.figshare.com/ndownloader/files/15592583)
Supplement: Supplementary file 1 [file 15592583]

## **Supplementary File 2: Data Extraction Checklist (Higgins & Green, 2008)**

### Source

- Study ID (created by review author).
- Citation

### Eligibility

- Confirm eligibility for review.
- Reason for exclusion.

### Methods

- Study design.
- Total study duration.

### Participants

- Total number.
- Age.
- Sex.
- Country.

### Interventions

- Total number of intervention groups.

### For each intervention and comparison group of interest:

- Specific intervention.
- Intervention details (sufficient for replication, if feasible).
- Integrity of intervention.

### Outcomes

- Outcomes and time points

### Results

- Summary data for each intervention group
